# Supplementary material
Source: Springer Nature journal article supplement (https://www.springermedizin.de/resource/supplementary/12890_2014_632_MOESM1_ESM.pdf/9505522)
Supplement: MOESM1 [file 9505522]

Potentially relevant articles  
identified through electronic  
databases and reference  
checking

n = 248

Excluded citations  
(on title and abstract)  
n = 226

Full-text studies retrieved  
for eligibility

n = 22

Excluded citations (on full text)

- Because expert opinion
- No specific criteria or parameters describing decannulation process
- Pediatric population

n = 12

Included studies

n = 10
